# Supplementary material for: The Fanconi anemia core complex promotes CtIP-dependent end resection to drive homologous recombination at DNA double-strand breaks
Source: PubMed Central journal article supplement — Nat Commun. 2024 Aug 16;15:7076. doi: 10.1038/s41467-024-51090-6 (PMC11329772; doi:10.1038/s41467-024-51090-6), 2024-08-16
Supplement: 41467_2024_51090_MOESM1_ESM.pdf [file 41467_2024_51090_MOESM1_ESM.pdf]

# **The Fanconi anemia core complex promotes CtIP-dependent end resection to drive homologous recombination at DNA double-strand breaks**

Bert van de Kooij, Fenna J. van der Wal, Magdalena B. Rother, Wouter Wiegant, Pau Creixell, Merula Stout, Brian A. Joughin, Julia Vornberger, Matthias Altmeyer, Marcel A.T.M. van Vugt, Michael B. Yaffe and Haico van Attikum

This file includes:

- Supplementary Table 1
- Supplementary Table 2
- Supplementary Figure 1
- Supplementary Figure 2
- Supplementary Figure 3
- Supplementary Figure 4
- Supplementary Figure 5
- Supplementary Figure 6

**Supplementary Table 1. Oligo table.** The NNNNNN stretch in Illumina PCR 2 FWD refers to the indices used for de-multiplexing (also see Supplementary Data 2).

| Name                        | Sequence 5' to 3'                                                                                              |
|-----------------------------|----------------------------------------------------------------------------------------------------------------|
| Kinome subpool lib FWD      | CATTCTGCACGCTTCAAAAG                                                                                           |
| Chromatin subpool lib FWD   | GACTGGTTCCAATTGACAAGC                                                                                          |
| Ubiquitin subpool lib FWD   | ATCAGTTTCGCTTCTCGCTTC                                                                                          |
| Phosphatase subpool lib FWD | TACCCATACGACGTCCCAGA                                                                                           |
| U6 FWD for sgRNA library    | GTGGAAAGGACGAAACACCG                                                                                           |
| sgRNA scaffold for library  | GTTTTAGAGCTAGAAATAGCAAGTT                                                                                      |
| Overhang for library        | GCGTAGGCTA                                                                                                     |
| sgRNA lib outer REV         | GAAATAGCAAGTTGCGTAGGCTA                                                                                        |
| sgRNA lib inner REV         | GTTTTAGAGCTAGAAATAGCAAGTT                                                                                      |
| Illumina PCR1 FWD           | ACACGACGCTCTCCGATCTYRYRGGAAAGGACGAAACACCG                                                                      |
| Illumina PCR1 REV           | CGGCATTCTCTGCTGAACCGCTCTCCGATCTGTGGATGAATAC<br>TGCCATTTGTCT                                                    |
| Illumina PCR2 FWD           | AATGATACGGCGACCACCGAGATCTACACNNNNNNNACACTCTT<br>TCCCTACACGACGCTCTCCGATCT                                       |
| Illumina PCR2 REV           | AGATCTTGAGACAAATGGCAGTATTCATCCACAGATCGGAAGA<br>GCGGTTACAGCAGGAATGCCGAGACCGGCCACCGGATCTCGTA<br>TGCCGTCTTCTGCTTG |
| AsiSI DSB1 335_F            | GAATCGGATGTATGCGACTGATC                                                                                        |
| AsiSI DSB1 335_R            | TTCCAAAGTTATTCCAACCCGAT                                                                                        |
| AsiSI DSB 1 1618_F          | TGAGGAGGTGACATTAGAACTCAGA                                                                                      |
| AsiSI DSB 1 1618_R          | AGGACTCACTTACACGGCCTTT                                                                                         |
| AsiSI DSB 2 364_F           | GGAGACTTGGAGGAGGGACC                                                                                           |
| AsiSI DSB 2 364_R           | ACAGCACCCAAAACCCATT                                                                                            |
| AsiSI DSB 2 1754_F          | GAAGCCATCCTACTCTTCTCACCT                                                                                       |
| AsiSI DSB 1754_R            | GCTGGAGATGATGAAGCCCA                                                                                           |
| FANCL qRT_1 FWD             | TGGACACCTCAGAGCTCCTT                                                                                           |
| FANCL qRT_1 REV             | TGCAATTCTGCGTGCTGTTG                                                                                           |
| B-Actin qRT F               | ACTCTTCCAGCCTTCCTTCC                                                                                           |
| B-Actin qRT R               | CAATGCCAGGGTACATGGTG                                                                                           |

**Supplementary Table 2. Antibody table.** WB=western blot, IF=immunofluorescence, FC=flow cytometry.

| Target        | Species | Company        | Cat. No., Clone            | Lot No.     | Application and dilution    |
|---------------|---------|----------------|----------------------------|-------------|-----------------------------|
| Ube2T         | Rabbit  | Abcam          | ab140611                   | YJ062105CS  | WB (1:1000)                 |
| FANCD2        | Mouse   | Santa Cruz     | sc-20022                   | D1221       | IF (1:100) and WB (1:1000)  |
| FANCD2        | Rabbit  | Novus          | NB100-182                  | L3          | WB (1:10000)                |
| HSP90         | Mouse   | Santa-Cruz     | Sc-13119                   | G2420       | WB (1:1000)                 |
| Tubulin       | Mouse   | Sigma Aldrich  | T6199, clone DM1A          | 127611      | WB (1:5000)                 |
| $\gamma$ H2AX | Mouse   | Millipore      | #05-636, clone JBW301      | 4047974     | IF (1:2000)                 |
| MDC1          | Rabbit  | Abcam          | ab11171-50                 | GR252252-10 | WB (1:1000)                 |
| pRPA (S4/S8)  | Rabbit  | Bethyl         | A300-245A                  | 9           | IF (1:1000)                 |
| Rad51         | Mouse   | Genetex        | GTX70230, Clone 14B4       | 42590       | IF (1:500)                  |
| CtIP          | Mouse   | Sigma Aldrich  | MABE1060, Clone 14-1       | 3780584     | WB (1:1000) and IF (1:1000) |
| CtIP          | Mouse   | Santa Cruz     | sc-271339, Clone D-4       | F1510       | WB (1:500)                  |
| Actin         | Mouse   | MpBiomedicals  | 869100, Clone C4           | SR05927-1   | WB (1:1000)                 |
| BrdU          | Mouse   | Roche          | 11170376001, Clone BMC9318 | 10875400    | FC (1:200)                  |
| Mre11         | Rabbit  | Cell Signaling | 4895                       | 3           | WB (1:1000)                 |
| GFP           | Rabbit  | Abcam          | Ab290                      | GR3321575-1 | WB (1:5000)                 |

## Supplementary Figure 1

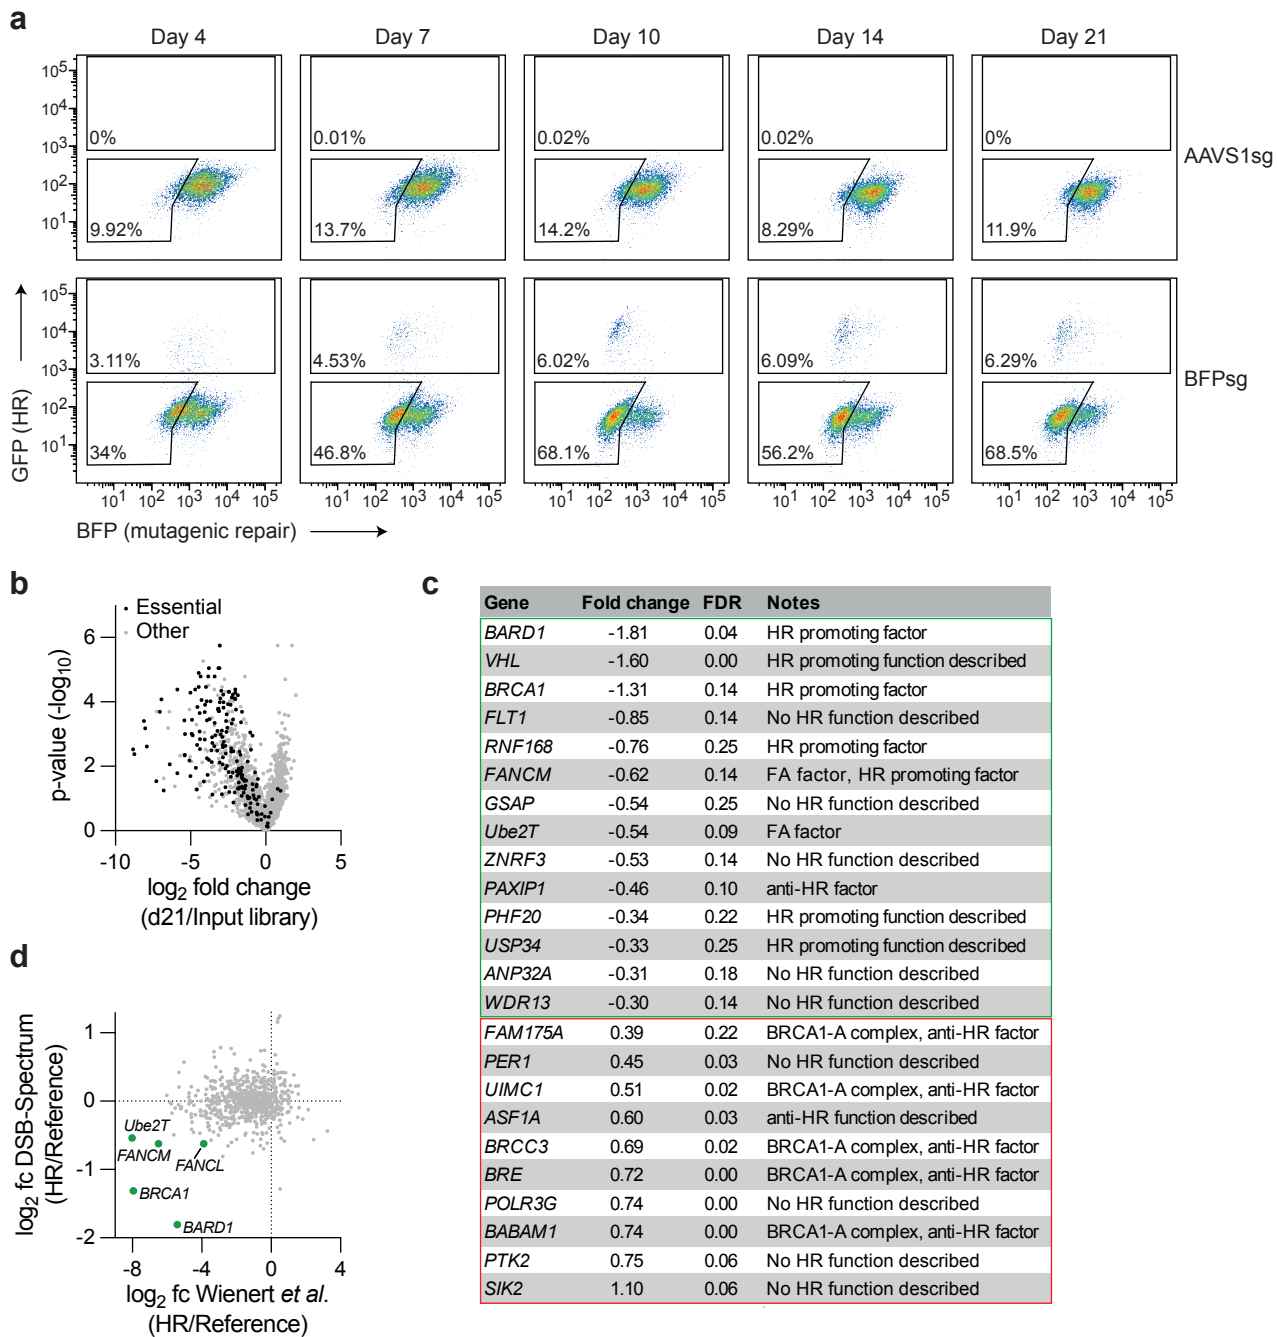

**Supplementary Figure 1. Quality control of a targeted CRISPR screen in DSB-Spectrum reporter cells. (a)** Representative flow cytometry dot plots of the experiment shown in figure 1b. **(b)** Volcano plot showing the gene targets of sgRNAs that were either enriched or depleted from the total population, as compared to the input sgRNA library, at 21 days after lentiviral introduction of the sgRNA library. Genes were identified as essential based on Wang *et al.*, 2015. Enrichment and statistics were determined by MAGeCK. **(c)** Table listing all hits from the HR branch of the screen, defined as genes with cognate sgRNAs enriched or depleted with an False Discovery Rate (FDR) cut-off of  $\leq 0.26$ . HR promoting factors and anti-HR factors are outlined with a green and red box, respectively. **(d)** Comparison between this study and Wienert *et al.*, 2020 of sgRNA depletion and enrichment in the HR population compared to the reference population. HR-promoting factors that were identified by both studies are indicated in green (fc=fold change). Source data are provided as a Source Data file.

## Supplementary Figure 2

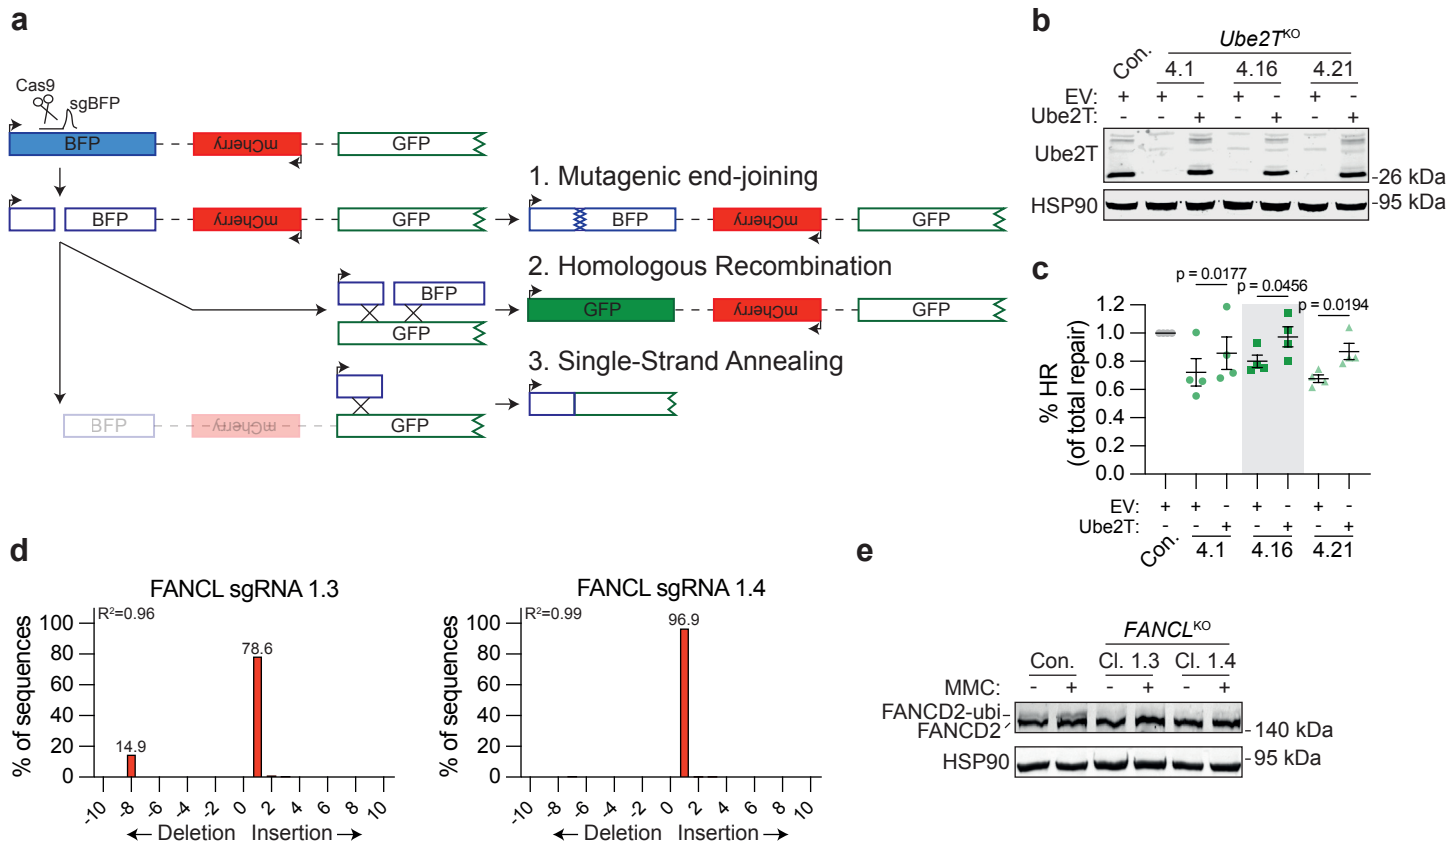

**Supplementary Figure 2. Ube2T and FANCL promote DSB-repair by HR.** (a) Schematic of the DSB-Spectrum\_V3 reporter. Adapted from van de Kooij *et al.*, 2022. (b) Western blot showing Ube2T expression in the cells analyzed in panel c. (c) Indicated HEK 293T+DSB-Spectrum\_V3 cell lines were co-transfected with either an empty vector (EV) or Ube2T cDNA, together with the reporter targeting Cas9-sgRNA constructs. Next, cells were analyzed by flow cytometry to determine the frequency of repair by each of the three indicated pathways (n=4 independent biological repeats; mean±SEM; paired t-test). (d) InDel formation at the sgRNA target site in the *FANCL* gene was analyzed using TIDE. Exact percentages are indicated as numbers above the bars, the  $R^2$  value indicates the goodness of fit of the modelled InDel spectrum on the composite sequence. (e) HEK 293T+DSB-Spectrum\_V3 *FANCL*<sup>KO</sup> clones 1.3 and 1.4, as well as the parental control (Con.) were treated with Mitomycin C (MMC, 300 nM) for 24h. Next, FANCD2 ubiquitination status was analyzed by western blotting. Source data are provided as a Source Data file.

## Supplementary Figure 3

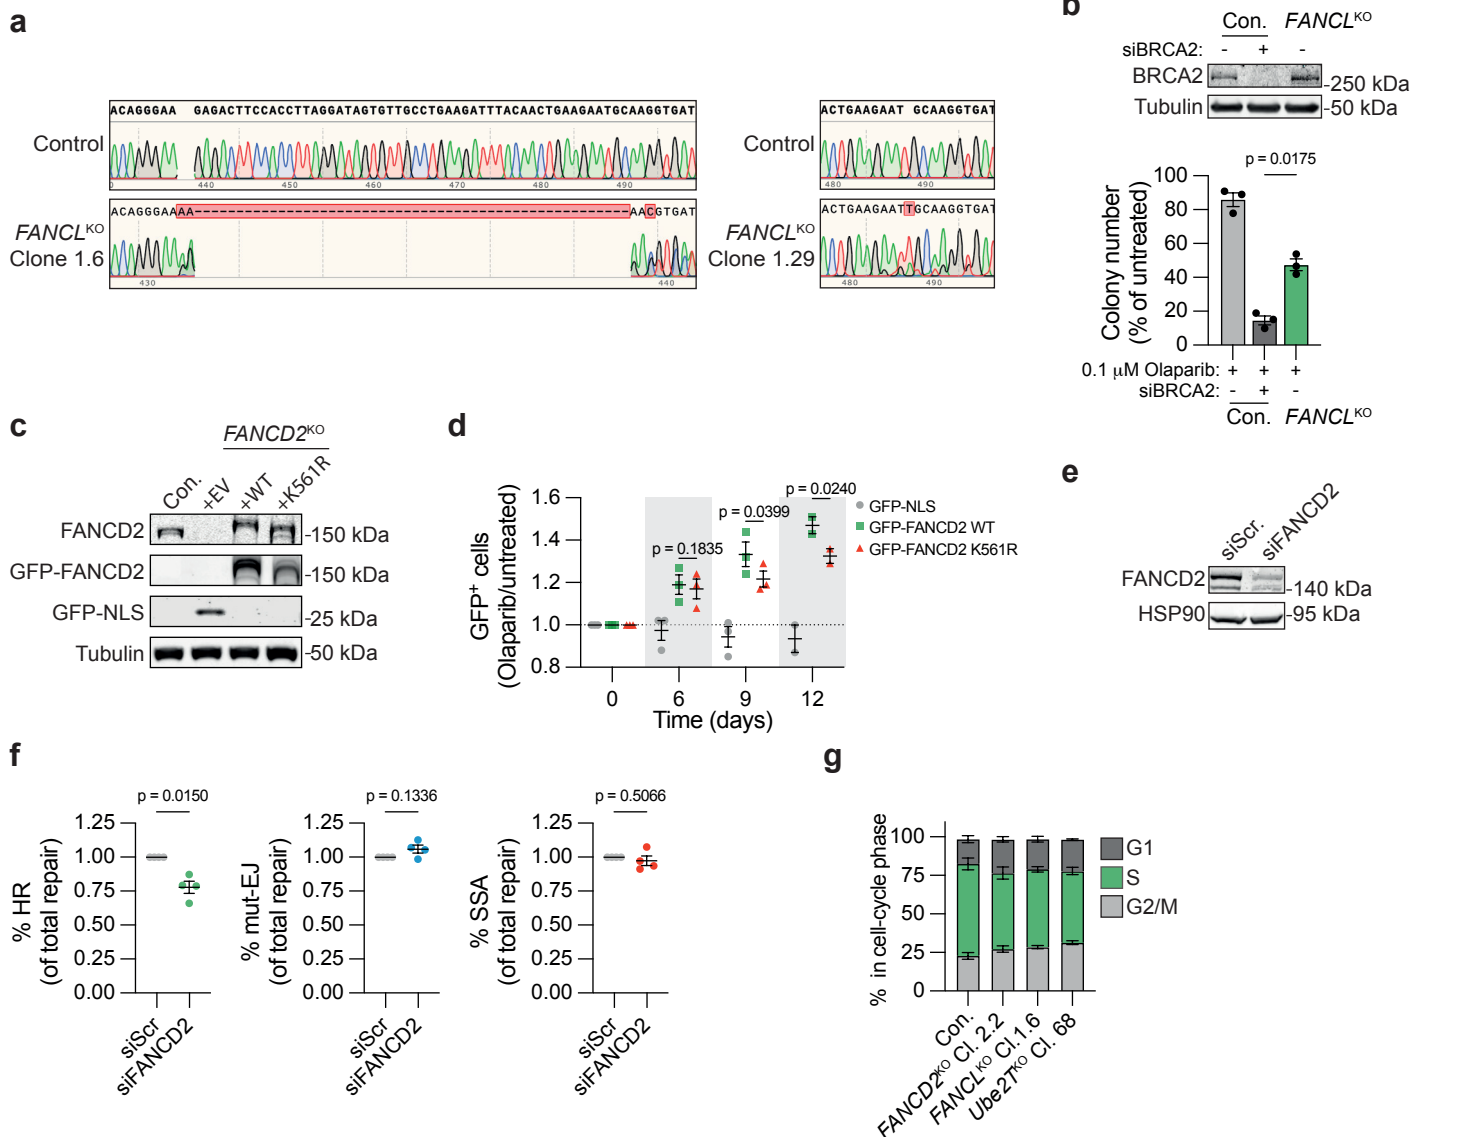

**Supplementary Figure 3. Loss of FANCL and FANCD2 ubiquitination causes PARPi sensitivity.** (a) DNA sequence alignment of the *FANCL* sgRNA target site in unedited control cells and the U2OS *FANCL*<sup>KO</sup> clones. Depicted are representative sequence chromatograms, red shaded boxes indicate deviations in the DNA sequence of the *FANCL*<sup>KO</sup> clone compared to control. (b) Wild-type control (Con.) U2OS cells were transfected with a control or BRCA2-targeting siRNA. Next, these cells, together with U2OS *FANCL*<sup>KO</sup> cells, were treated with olaparib for 14 days. Cell viability was assed by clonogenic survival. Upper panel shows western blot analysis for BRCA2 knock-down, lower panel shows the number of surviving colonies (n=3 independent biological repeats; mean±SEM; Ratio paired t-test). (c) U2OS *FANCD2*<sup>KO</sup> clone 2.2 was lentivirally infected to express GFP-NLS (+EV), GFP-FANCD2 WT, or GFP-FANCD2 K561R. Cells were analyzed by Western blot for FANCD2 expression. (d) The cells described in panel c were mixed 1:1 with the GFP-negative *FANCD2*<sup>KO</sup> parental cells. Next, cells were treated with olaparib (1 μM) for 12 days, and the fraction of GFP-positive cells in the mixed population was monitored by flow cytometry. Plotted is the fraction of GFP-positive cells in the olaparib treated population, normalized for the fraction in the untreated population to correct for olaparib independent growth differences (n=3 independent biological repeats, except for day 12 for which n=2; mean±SEM; paired t-test). (e) Western blot showing FANCD2 knockdown in FANCD2 siRNA transfected HEK 293T+DSB-Spectrum\_V3 cells. (f) HEK 293T+DSB-Spectrum\_V3 cells were transfected with indicated siRNAs (siScr=siScrambled), followed by a reporter assay as described for figure 2b (n=4 independent biological repeats; mean±SEM; Paired t-test). (g) The cell-cycle profile of indicated, asynchronously growing, cell lines was determined by flow cytometry. The differences between each of the knock-out cell lines and the wild-type control cell line were not significant, for neither of the cell-cycle stages (n=3 independent biological repeats; mean±SEM; One-way ANOVA+Dunnett's multiple comparison; p-value ranged from 0.1009 to 0.5659). Source data are provided as a Source Data file.

## Supplementary Figure 4

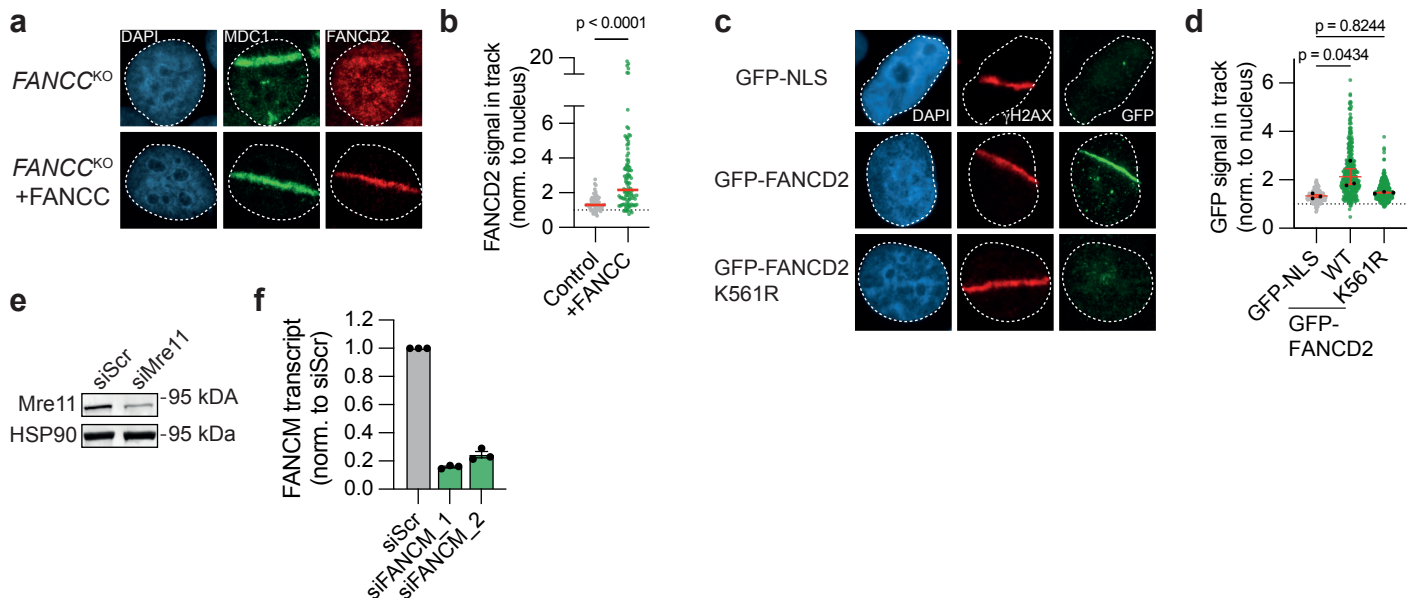

**Supplementary Figure 4. FANCL, Ube2T and FANCD2 accumulate at DSBs.** (a, b) FANCD2 recruitment to UV-A laser induced DNA damage was analyzed by immunofluorescence microscopy in FANCC-deficient VU1131 fibroblasts, reconstituted or not with FANCC cDNA. Shown are representative images (a) and quantification (b) of one of two independent biological replicates. Dotted line is set at 1 (*i.e.* no recruitment to the track), red lines indicate median ( $n=63, 106$  (Control, +FANCC); Mann-Whitney test). (c, d) IF-microscopy of UV-A laser micro-irradiated U2OS *FANCD2*<sup>KO</sup> cells, stably expressing GFP-NLS, or GFP-tagged FANCD2. Panel c shows representative images, panel d shows the quantification. Plotted are the data from all biological repeats. Each grey or green dot represents an individual track, black dots are the median for each biological repeat ( $n=3$ ; mean $\pm$ SEM; ANOVA with post-hoc Dunnetts on the medians). (e) Mre11 protein levels in the cells analyzed in figure 4j, k were analyzed by western blot. (f) FANCM transcript levels in the cells analyzed in figure 4j, k were analyzed by qPCR (technical triplicate; mean $\pm$ SEM). Source data are provided as a Source Data file.

## Supplementary Figure 5

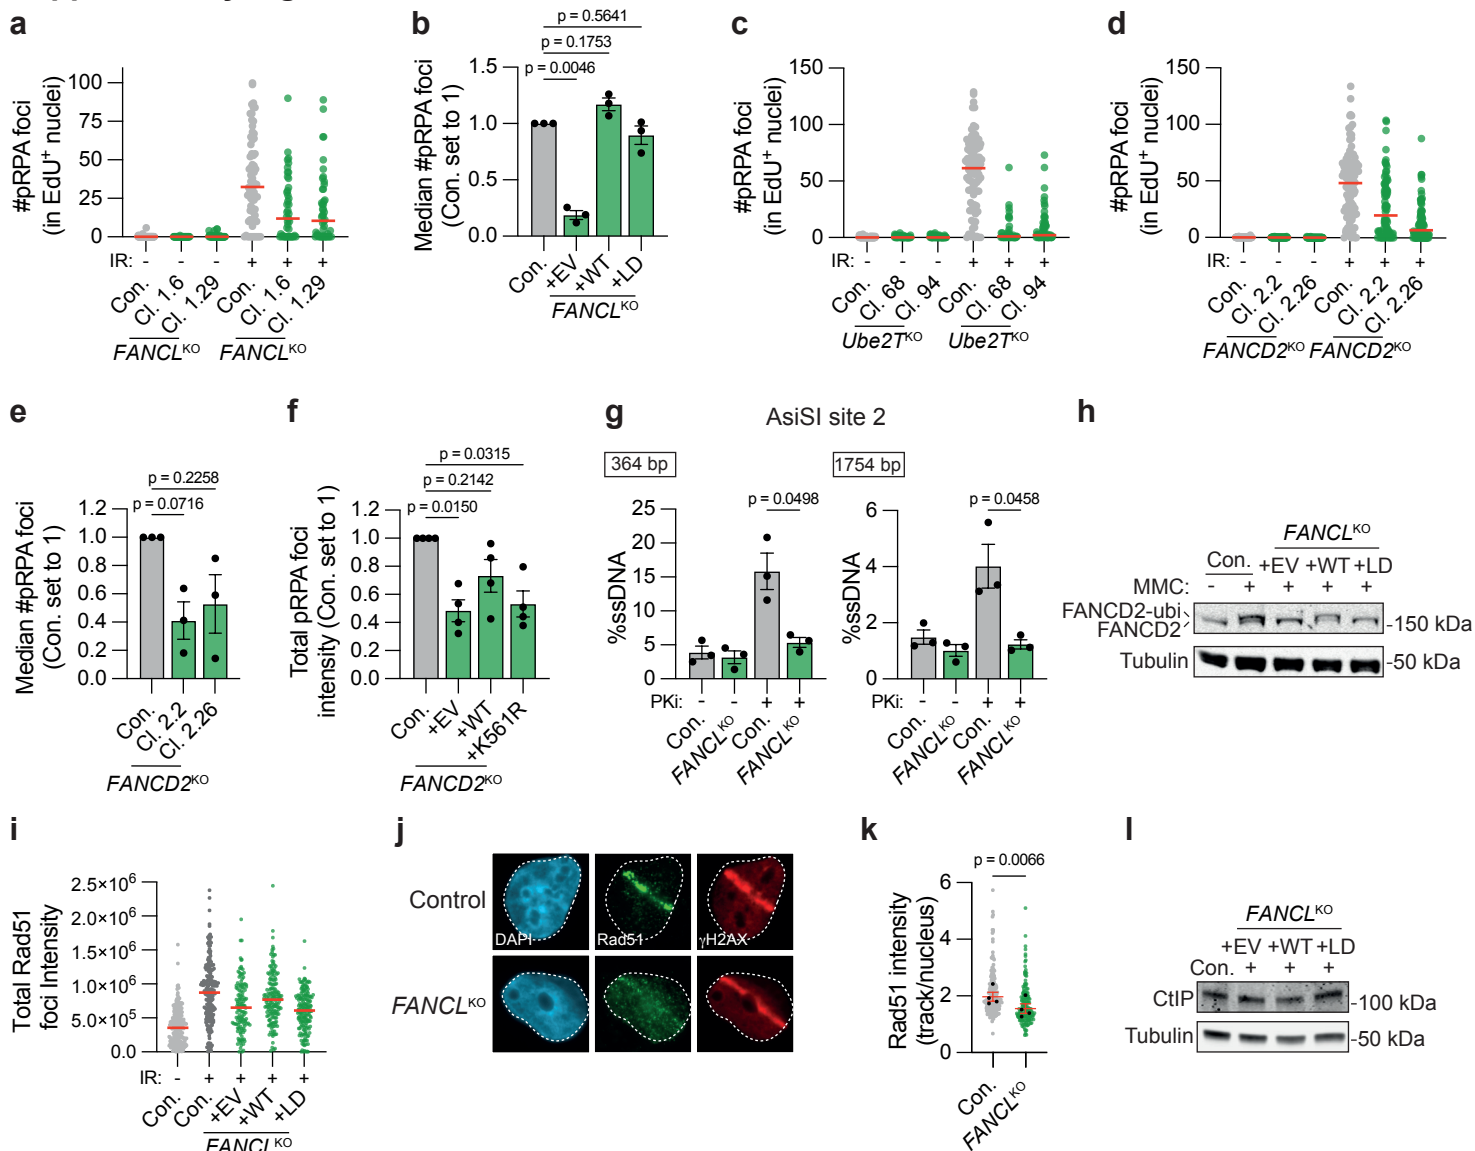

**Supplementary Figure 5. FANCL, Ube2T and FANCD2 promote end resection at DNA double-strand breaks. (a)** Depicted is a representative biological repeat of the experiment shown in figure 5a, b. **(b)** For the experiment shown in figure 5c, the number of pRPA foci per S-phase nucleus was plotted (n=3 independent biological repeats; mean±SEM; one-way ANOVA with post-hoc Dunnett's). **(c)** As in figure 5a,b, but for *Ube2T*<sup>KO</sup> cells. Depicted is a representative experiment of two biological repeats. **(d, e)** As in figure 5a, b, but for *FANCD2*<sup>KO</sup> cells. Panel d shows the quantification of a representative experiment, panel e shows the quantification of the three biological repeats (n=3 independent biological repeats; mean±SEM; one-way ANOVA with post-hoc Dunnett's). **(f)** As in panel e, but for *FANCD2*<sup>KO</sup> clone 2.2 reconstituted with either GFP-NLS (EV), GFP-FANCD2 WT or GFP-FANCD2 K561R (n=4 independent biological repeats; mean±SEM; one-way ANOVA with post-hoc Dunnett's). **(g)** As in figure 5f, but for a second AsiSI-targeted locus (n=3 independent biological repeats; mean±SEM; paired t-test) **(h)** Western blot analysis of FANCD2 ubiquitination in U2OS AsiSI cells re-expressing FANCL wild-type (WT) or ligase-dead (LD; EV=empty vector, MMC=mitomycin C, 1 μM). **(i)** Depicted is a representative biological repeat of the experiment shown in figure 5j. Each symbol is a single S-phase nucleus. **(j, k)** IF-microscopy of UV-A laser micro-irradiated cells. Panel i shows representative images, panel k shows the quantification. Plotted are the data from all biological repeats. Each grey or green dot represents an individual track, black dots are the median for each biological repeat (n=4 independent biological repeats; mean±SEM; ratio paired t-test). **(l)** Western blot showing CtIP protein levels in control cells and reconstituted U2OS *FANCL*<sup>KO</sup> cells lines. Source data are provided as a Source Data file.



## Supplementary Figure 6

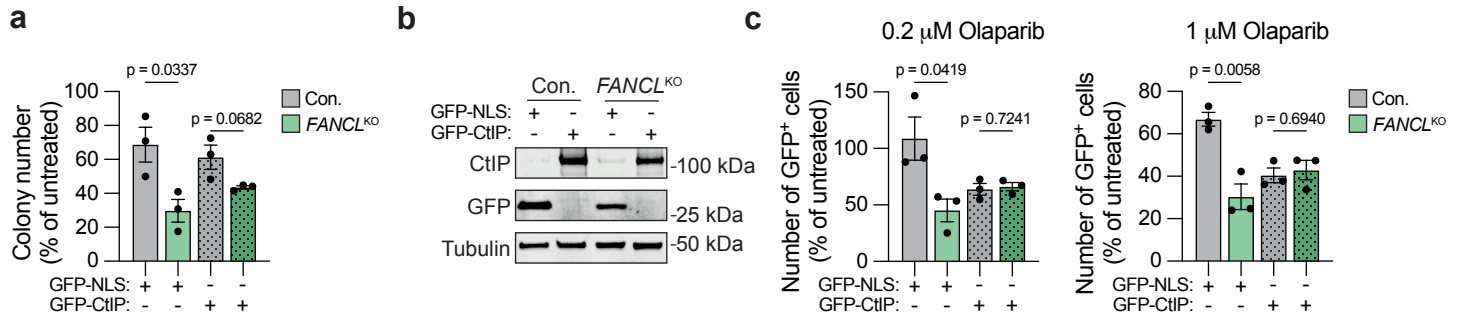

**Supplementary Figure 6. CtIP overexpression rescues the PARPi sensitivity of *FANCL*<sup>KO</sup> cells.** (a) U2OS *FANCL*<sup>KO</sup> and wild-type control cells were transfected to express GFP alone or GFP-tagged CtIP, followed by FACS to enrich for GFP-positive cells. Next, these cells were plated for clonogenic outgrowth in the presence or absence of olaparib (0.2 μM; n=3 independent biological repeats; mean±SEM; unpaired t-test). (b) Western blot showing expression levels of GFP-CtIP after transient transfection. (c) U2OS *FANCL*<sup>KO</sup> and wild-type control cells were transfected to express GFP alone or GFP-tagged CtIP, and treated with olaparib (0.2 μM left panel, 1 μM right panel). The number of live, GFP-positive cells was determined by flow cytometry at four days after the start of the treatment (n=3 independent biological repeats; mean±SEM; unpaired t-test). Source data are provided as a Source Data file.
