# Supplementary material for: The Fanconi anemia core complex promotes CtIP-dependent end resection to drive homologous recombination at DNA double-strand breaks
Source: PubMed Central journal article supplement — Nat Commun. 2024 Aug 16;15:7076. doi: 10.1038/s41467-024-51090-6 (PMC11329772; doi:10.1038/s41467-024-51090-6), 2024-08-16
Supplement: 41467_2024_51090_MOESM3_ESM.pdf [file 41467_2024_51090_MOESM3_ESM.pdf]

## **Description of Additional Supplementary Files**

File name: Supplementary Data 1

Description: List of sgRNA sequences present in the library used in the CRISPR/Cas9 screen presented in figure 1 and Supplementary figure 1.

File name: Supplementary Data 2

Description: Results and additional information of the CRISPR/Cas9 screen presented in figure 1 and Supplementary figure 1. Included are Illumina sequencing indexes, raw read counts and processed results.
